# Supplementary material for: Genetic heterogeneity of Plasmodium falciparum across areas of varying transmission intensity in Ethiopia based on merozoite surface protein (msp) genes msp1 and msp2
Source: Research Square preprint supplement (doi:10.21203/rs.3.rs-8218895/v1), 2025-12-04
Supplement: Supplementary file 1 [file a359555a60a25e5652e1ad5b.docx]

Additional File 1: Primers used for *msp1* genotyping

| Primer | Sequence |
| --- | --- |
| M1-OF | 5'-CTA GAA GCT TTA GAA GAT GCA GTA TTG-3' |
| M1-OR | 5'-CTT AAA TAG TAT TCT AAT TCA AGT GGA-3' |
| M1-KF | 5'-AATGAA GAAGAA ATT ACT ACA AAA GGT-3' |
| M1-KR | 5'-GCT TGC ATC AGC TGG AGG GCTTGC ACC-3' |
| M1-RF | 5'-TAAAGGATG GAGCAAATACTCAAGTTG-3' |
| M1-RR | 5'-CATCTGAAGGATTTGCAGCACCTG GAG-3' |
| M1-MF | 5'-AAA TGAAGGAACAAGTGGAACAGCTGT-3' |
| MI-MR | 5'-ATCTGAAGGATTTGTACGTCTTGAATT-3' |

Additional File 2: Primers used for *msp2* genotyping

| Primer | Sequence |
| --- | --- |
| M2-OF | 5'-ATGAAGGTAATTAADACATTGTCTATT-3' |
| M2-OR | 5'-CTTTGTTACCATCGGTACATTCTT-3' |
| FC27-B1 | 5'-GCAAATGAAGGTTCTAATACTAATAG-3' |
| FC27-B2 | 5'-GCTTTGGGTCCTTCTTCAGTTGATTC-3' |
| IC/3D7-A1 | 5'-GCAGAAAGTAAG CCTTCTACTGGTGCT-3' |
| IC/3D7-A2 | 5'-GATTTGTTTCGGCATTATTATGA-3' |
